# Supplementary material for: The HDAC6/APOBEC3G complex regulates HIV-1 infectiveness by inducing Vif autophagic degradation
Source: PubMed Central journal article supplement (PMC4479245; doi:10.1186/s12977-015-0181-5), 2015-06-24

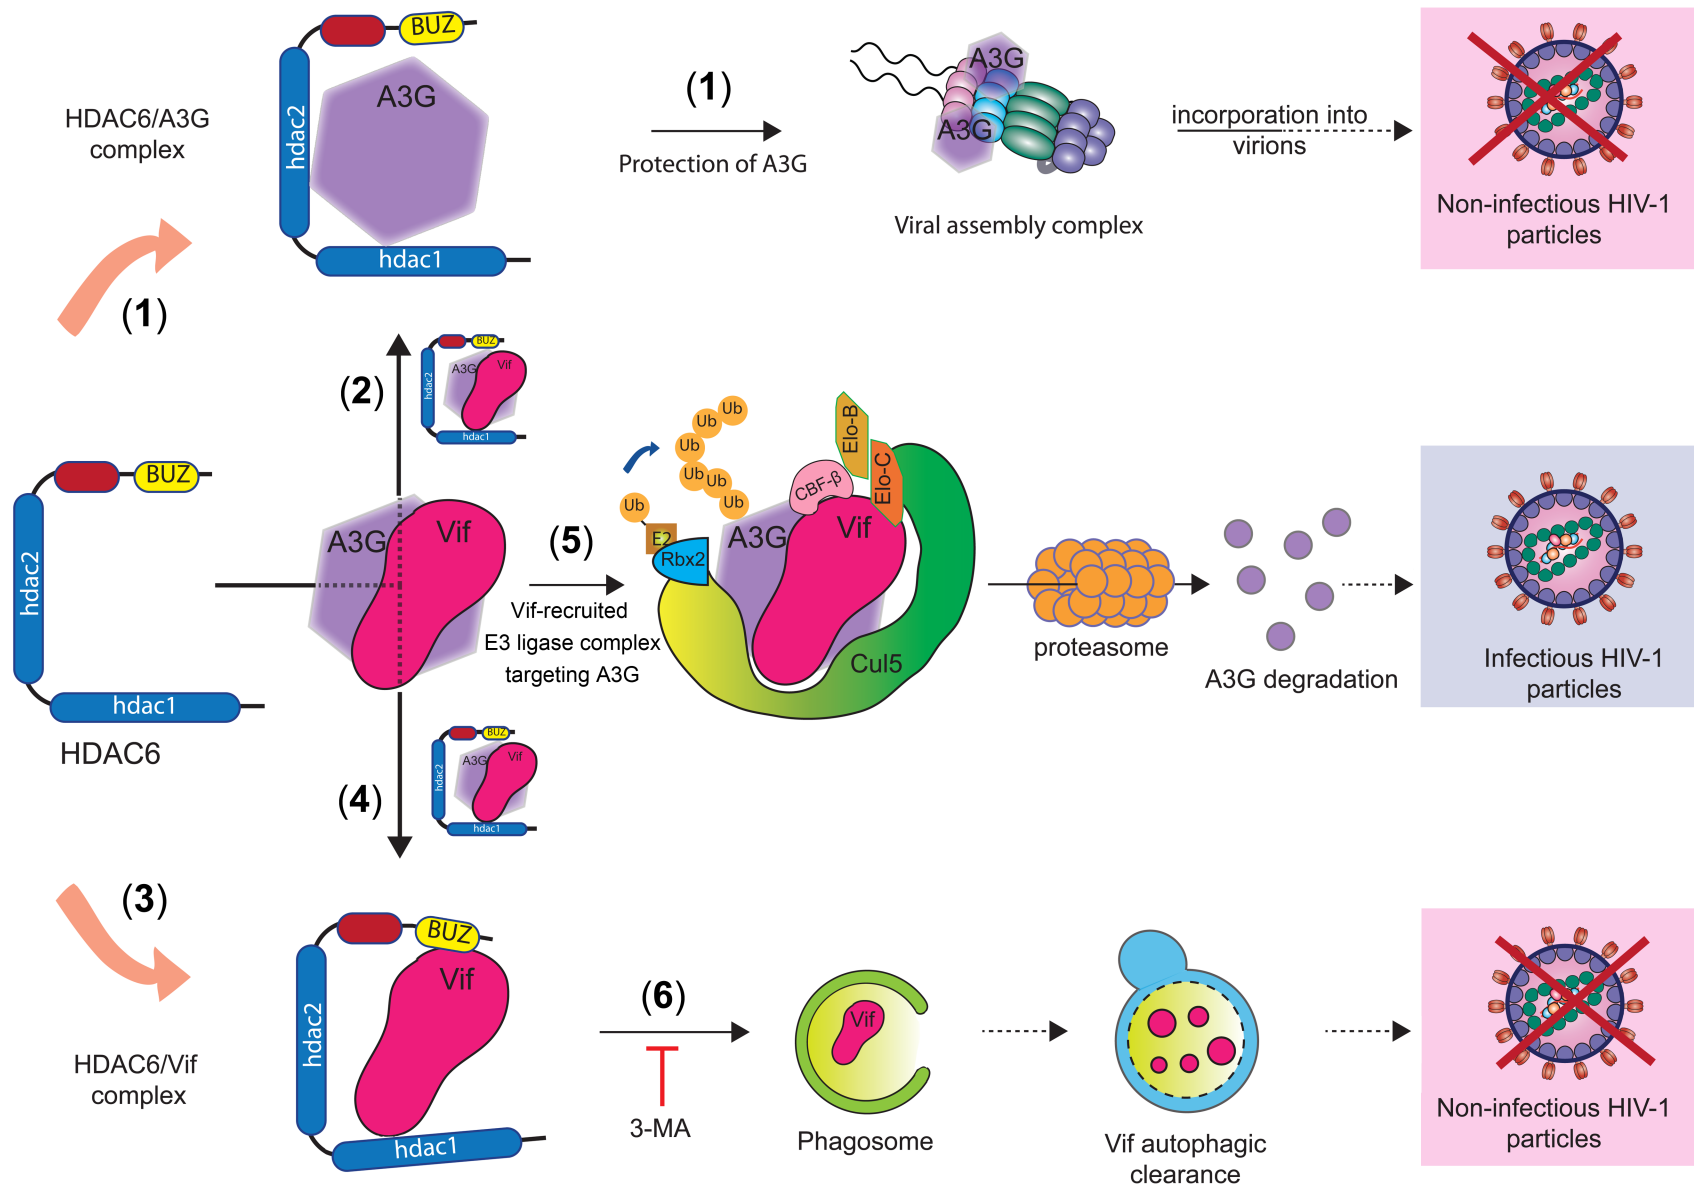

Supplement: 12977_2015_181_MOESM1_ESM.pdf [file 12977_2015_181_MOESM1_ESM.pdf]
